# Supplementary material for: Gastrodia and Uncaria (tianma gouteng) water extract exerts antioxidative and antiapoptotic effects against cerebral ischemia in vitro and in vivo
Source: PubMed Central journal article supplement (PMC4888490; doi:10.1186/s13020-016-0097-6), 2016-05-31
Supplement: 13020_2016_97_MOESM5_ESM.pdf [file 13020_2016_97_MOESM5_ESM.pdf]

# Welcome to

## Animal Experimentation Ethics Committee

### Membership and Terms of Reference

#### Membership

|                      |                             |                     |                                                                                        |
|----------------------|-----------------------------|---------------------|----------------------------------------------------------------------------------------|
| Chairman:            | Professor LAN Hui Yao       | Professor           | Li Ka Shing Institute of Health Sciences, Faculty of Medicine                          |
| Members:             | Professor CHEN Yangchao     | Assistant Professor | School of Biomedical Sciences, Faculty of Medicine                                     |
|                      | Professor CHEN Zhen Yu      | Professor           | School of Life Sciences, Faculty of Science                                            |
|                      | Professor HUI Mamie         | Associate Professor | Department of Microbiology, Faculty of Medicine                                        |
|                      | Mr. HUI Lap Chung Stephen   | Hostel Manager      | Madam S.H. Ho Hostel for Medical Students                                              |
|                      | Mr. LAM Shi Kai             | Director            | University Safety Office                                                               |
|                      | Dr. LEONG Yin-Ming Veronica | Veterinary Officer  | Agriculture, Fisheries and Conservation Department, HKSAR Government                   |
|                      | Professor LI Gang           | Professor           | Department of Orthopaedics and Traumatology, Faculty of Medicine                       |
|                      | Reverend MILLER Stephen     | Senior Chaplain     | The Mission to Seafarers, The Mariners' Club                                           |
|                      | Professor NG Chi Fai        | Professor           | Department of Surgery, Faculty of Medicine                                             |
|                      | Dr. RIGGS Christopher M.    | Head                | Department of Veterinary Clinical Services, Equine Hospital, The Hong Kong Jockey Club |
|                      | Professor RUDD John A.      | Professor           | School of Biomedical Sciences, Faculty of Medicine                                     |
|                      | Dr TANG Mei Kuen Florence   | Lecturer            | School of Biomedical Sciences, Faculty of Medicine                                     |
|                      | Ex-officio                  | Professor XIE Zuwei | Associate Dean (Research)                                                              |
| Dr. ROWLANDS Dewi K. |                             | Director            | Laboratory Animal Services Centre, Faculty of Medicine                                 |
| Secretary:           | Ms. KONG Mui Kam Maria      | Senior Technician   | Faculty and Planning Office, Faculty of Medicine                                       |

Website: [www.aeec.med.cuhk.edu.hk](http://www.aeec.med.cuhk.edu.hk)

#### Terms of Reference

1. To consider all ethical issues relating to the use of experimental animals for the purposes of research, teaching and other scientific investigations.
2. To ensure that all animal use procedures are conducted in such a way as to avoid any unnecessary usage, suffering and injury regarding the animals involved.
3. To review proposed animal use protocols and have the authority to approve, require modifications in (to secure approval), or disapprove such proposals.
4. To invite individuals with competence in special areas to assist in the review of complex issues which require expertise beyond or in addition to that available from among the committee.
5. To exercise authority delegated by the Research Committee when necessary to observe and monitor the implementation of the animal use protocols or to appoint a third party to observe and monitor the procedures.
6. To exercise authority delegated by the Research Committee when necessary to suspend or terminate approval of any animal use procedure that is not being conducted in accordance with generally accepted ethical requirements or that has been associated with unnecessary suffering or injury to the animal subject(s).

Any suspension or termination of approval will include a statement of the reasons for the committee's action. The investigator(s) and appropriate University official(s) shall be notified accordingly.

7. To report to the Research Committee annually the work of the committee, and report any special cases where appropriate.
